# Supplementary material for: Posttranscriptional Regulation of RhBRC1 (Rosa hybrida BRANCHED1) in Response to Sugars is Mediated via its Own 3′ Untranslated Region, with a Potential Role of RhPUF4 (Pumilio RNA-Binding Protein Family)
Source: MDPI journal article supplement (doi:10.3390/ijms20153808), 2019-08-04
Supplement: s1 [file s1]

3'UTR of *α-amylase 3*

CGGCUCAAGCCCUAAACUGAACGGGAUAGUCAUGCUCUAAACCAGUUUCUACACGGCAAGAAUUUACUGA  
UUCUUUAUACUUUUGCAGUCAAUUAAAUAUGGUUUUUAUAUAUGUAUUUUUGUAUCCGAUUGUAGUUG  
UAUCCGAUUGUAGCGUUCGAAUAAGUAGGCAGGCUCUCUAGCCUCUAGGUUAAUUGCGGGGCAUAUGU  
AGCUUGCCAGGCAUAUGUAGCUUGCCAGUUAUUGUGUUUGUAUCACGCAGUUUGUAACCGUUGGUGC  
AAUAUAUAAUGUCAGGUUCAGG

3'UTR of *AtBRC1*

AACUGAUUUCAUUUUAAACAUUAAUAUCUCAAUUUAAUGAUUAUAGUUUGGUGAGAGAGAUUAGUUAUU  
CCAUCUUAUGUUUUUUUUUCUUAACAUCGUAAUUAUUAUGUUUUAUUGAAGGCUUUUUCGUCAUUUU  
AGUGUCAAAUAUUAAACCUAUGUGAAGAAAUAAUGCAAUUUGUAUAAUAUUUUUGUUUUCAUAGUUCG  
AGUGGAU

3'UTR of *OsTB1*

UGUGAUCAUCCAUCCACACACGAACGAACGAACGAACGGUACGGCACUAAGAUCGAACUCCUGCAGCUA  
CAUAAUUAUCCUUUGCUUCUCAAGAGUAAUAAUUCUUGACGUGUAAUUAUCCGGGUGUGUAUUAAU  
UCCCUCUUUAUUUUUUUUUCUCGCGUUUAUCCGGAGUUGACUGUGGUGAAGACGAACUUUGGUUUUGGU  
CAUCGCAUGGUGUGCAUUGCAUAUAUAGCUAGCACUAUCGUCUGAUCGAUGAUUCAUCAUCAAUGGAGU  
CGUCUAGUAUUA
